# Supplementary material for: Sexual function and combined oral contraceptives: a randomised, placebo-controlled trial
Source: PubMed Central journal article supplement — Endocr Connect. 2018 Sep 26;7(11):1208–16. doi: 10.1530/EC-18-0384 (PMC6215801; doi:10.1530/ec-18-0384), 2018-09-26
Supplement: ec-7-1208-t001.pdf [file ec-7-1208-t001.pdf]

**Supplementary Table 1.** McCoy Female Sexuality Questionnaire (MFSQ) organised by domains of sexual function.

---

**I. Sexual interest**

- Enjoyment of sexual activity (1)
- Level of sexual interest (5)
- Frequency of sexual thoughts and fantasies (3)
- Excitement/arousal during sexual activity (4)

**II. Satisfaction frequency sexual activity**

- Satisfaction with frequency of sexual activity (2)
- Decreased satisfaction due to partner's disinterest (9)

**III. Vaginal lubrication**

- Vaginal lubrication (6)
- Insufficient lubrication (17)
- Painful sexual intercourse (18)

**IV. Orgasm**

- Additional stimulation to reach orgasm (16)
- Frequency of orgasm (14)
- Pleasure of orgasm (15)
- Enjoyment of sexual intercourse (13)

**V. Partner**

- Erectile problems, partner (19)
- Satisfaction with partner as friend (11)
- Satisfaction with partner as lover (10)

**VI. Attractiveness**

- How sexually attractive have you considered yourself? (7)
- How sexually attractive towards your partner have you considered yourself? (8)

**VII. Frequency**

- Intercourse/week (12)
- 

Number in brackets refers to the question number in the MFSQ
