# Supplementary material for: Sexual function and combined oral contraceptives: a randomised, placebo-controlled trial
Source: PubMed Central journal article supplement — Endocr Connect. 2018 Sep 26;7(11):1208–16. doi: 10.1530/EC-18-0384 (PMC6215801; doi:10.1530/ec-18-0384), 2018-09-26
Supplement: ec-7-1208-t002.pdf [file ec-7-1208-t002.pdf]

**Supplementary table 2.** Adverse events in the study population ( $n = 202$ )

| Adverse events             | COC <sup>a</sup><br>( $n = 102$ ) | Placebo<br>( $n = 100$ ) | P     |
|----------------------------|-----------------------------------|--------------------------|-------|
|                            | <i>n</i> (%)                      | <i>n</i> (%)             |       |
| Mood symptoms <sup>b</sup> | 34 (33.3)                         | 21 (21.0)                | 0.049 |
| Bleeding disturbances      | 26 (25.5)                         | 11 (11.0)                | 0.008 |
| Sexual                     | 13 (12.7)                         | 3 (3.0)                  | 0.010 |
| Decreased sexual interest  | 12 (11.8)                         | 3 (3.0)                  |       |
| Decreased lubrication      | 2 (2.0)                           | 0 (0.0)                  |       |
| Vaginal pain when aroused  | 1 (1.0)                           | 0 (0.0)                  |       |
| Acne                       | 9 (8.8)                           | 9 (9.0)                  | 0.965 |
| Breast swelling or pain    | 8 (7.8)                           | 5 (5.0)                  | 0.410 |
| Change in appetite         | 7 (6.9)                           | 6 (6.0)                  | 0.803 |
| Fatigue                    | 7 (6.9)                           | 7 (7.0)                  | 0.969 |
| Dysmenorrhea               | 2 (2.0)                           | 6 (6.0)                  | 0.141 |

<sup>a</sup>COC = combined oral contraceptive. Frequencies compared by Chi-square test or Fischer's exact test.

<sup>b</sup>Any report of depressed mood, anxiety, irritability, mood swings, difficulties concentrating, or affect lability
